# Supplementary material for: Screening of point defects in methylammonium lead halides: a Monte Carlo study
Source: Royal Society of Chemistry journal article supplement (doi:10.1039/c7tc05572b), 2018-01-01
Supplement: c7tc05572b1.pdf [file c7tc05572b1.pdf]

**Supplementary information:**  
**Screening of Point Defects in Methylammonium Lead Halides: a  
Monte Carlo Study**

Mantas Šimėnas,<sup>1</sup> Jūras Banys,<sup>1</sup> and Evaldas E. Tornau<sup>2</sup>

<sup>1</sup> Faculty of Physics, Vilnius University, Sauletekio 3, LT-10257 Vilnius, Lithuania

<sup>2</sup> Semiconductor Physics Institute, Center for Physical Sciences and Technology,  
Sauletekio 3, LT-10257 Vilnius, Lithuania

## Additional MC data

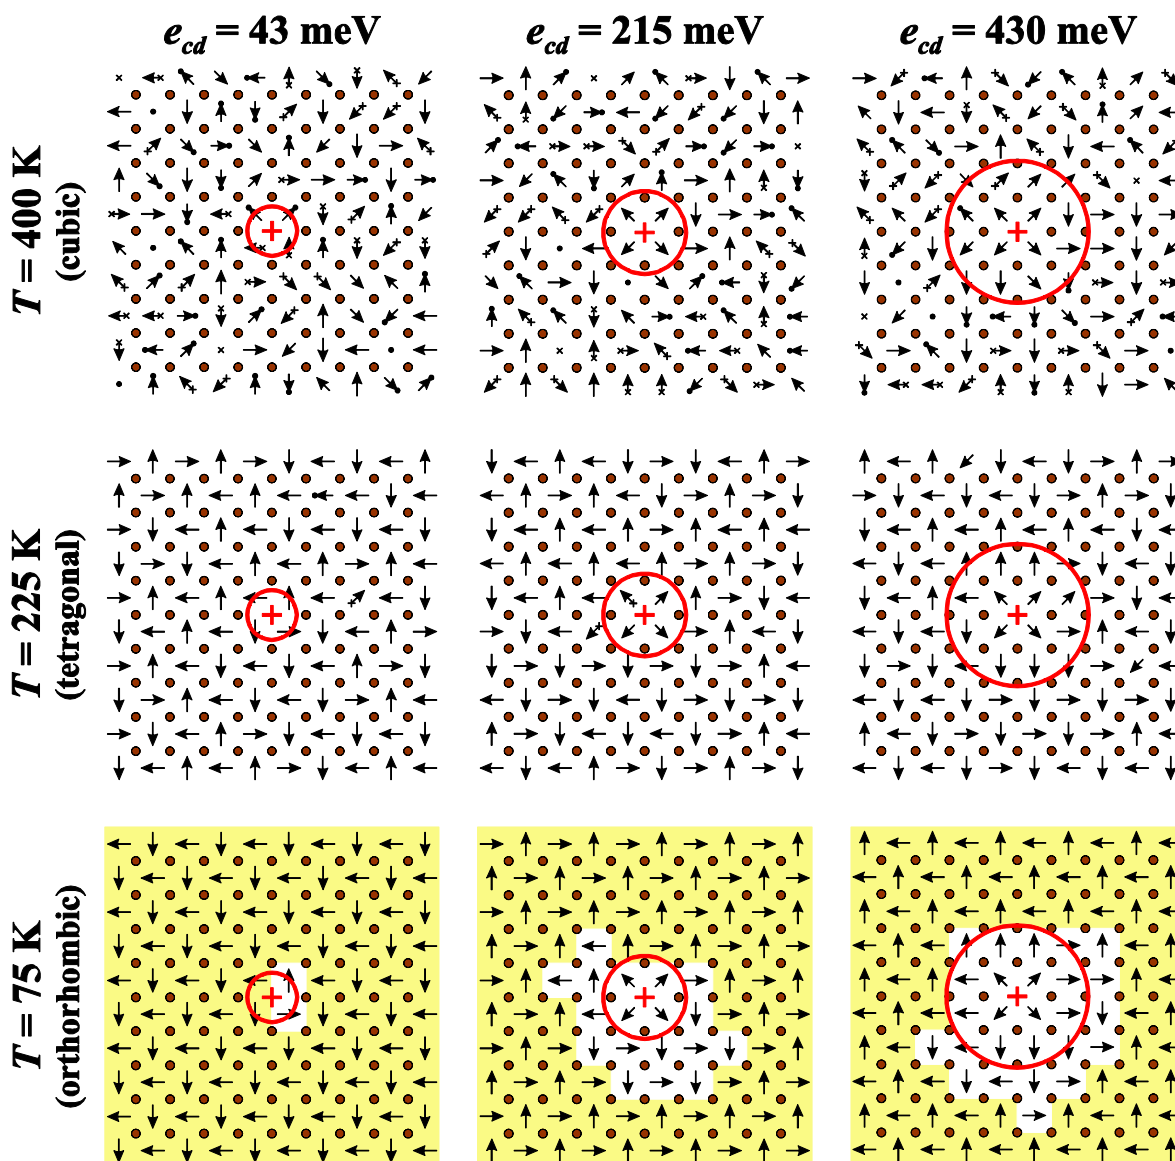

Figure S1. Arrangement of the MA<sup>+</sup> cations (black arrows) around a single positive halogen defect in the *ab*-plane obtained at different temperatures and  $e_{cd}$  interaction energies. The halogen atoms are represented as brown spheres. Temperatures correspond to the cubic, tetragonal and orthorhombic phases of MAPbI<sub>3</sub>. The undisturbed long-range order of the MA<sup>+</sup> cations at 75 K is shaded in yellow. The red circles around the defects mark the apparent screening radius. Other simulation parameters:  $e_1 = -43$ ,  $e_2 = -21$ ,  $e_{dd} = 8.6$  meV and  $r_c = 10$ .

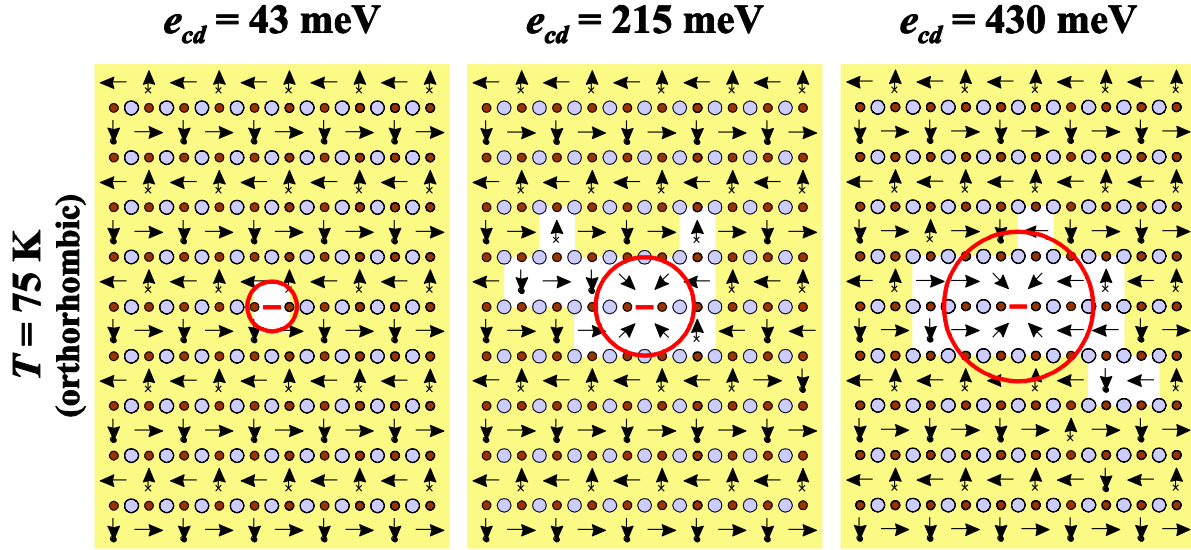

Figure S2. Arrangement of the  $\text{MA}^+$  cations (black arrows) around a single negative Pb defect in the (011)-plane obtained at different temperatures and  $e_{cd}$  interaction energies. The halogen atoms are represented as brown spheres, while Pb atoms are gray. Temperatures correspond to the cubic, tetragonal and orthorhombic phases of  $\text{MAPbI}_3$ . The undisturbed long-range order of the  $\text{MA}^+$  cations at 75 K is shaded in yellow. The red circles around the defects mark the apparent screening radius. Other simulation parameters:  $e_1 = -43$ ,  $e_2 = -21$ ,  $e_{dd} = 8.6$  meV and  $r_c = 10$ .
